# Supplementary material for: Platinized graphene fiber electrodes uncover direct spleen-vagus communication
Source: PubMed Central journal article supplement (PMC8448843; doi:10.1038/s42003-021-02628-7), 2021-09-17
Supplement: 42003_2021_2628_MOESM3_ESM.pdf [file 42003_2021_2628_MOESM3_ESM.pdf]

## **Description of Additional Supplementary Files**

**File name:** Supplementary Video 1

**Description:** The sutrode flexibility and impedance stability when making a knot.

**File name:** Supplementary Video 2

**Description:** The sutrode is used as conductive suture for muscle stimulation.

**File name:** Supplementary Video 3

**Description:** Splenic neurovascular plexus terminal branches.

**File name:** Supplementary Data 1

**Description:** Data underlying graphs and charts.
